# Supplementary material for: Alterations of protein complexes and pathways in genetic information flow and response to stimulus contribute to Escherichia coli resistance to balofloxacin
Source: Royal Society of Chemistry journal article supplement (doi:10.1039/c2mb25090j), 2012-05-17
Supplement: c2mb25090j.pdf [file c2mb25090j.pdf]

**Supplemental Table 1** Proteins identified by MALDI-TOF mass spectrometry.

| Spot No. | Protein                                                                               | Gene name   | NCBI No.    | Protein score | Pred. M.W | Peptides matched | Non-Peptides matched | Sequence coverage (%) |
|----------|---------------------------------------------------------------------------------------|-------------|-------------|---------------|-----------|------------------|----------------------|-----------------------|
| 1        | Glutamine synthetase                                                                  | <i>glnA</i> | gi 12518749 | 73            | 51883     | 6                | 19                   | 20                    |
| 2        | DNA-directed RNA polymerase, beta-subunit                                             | <i>rpoC</i> | gi 409789   | 110           | 155047    | 17               | 0                    | 19                    |
| 3        | Phenylalanyl-tRNA synthetase beta chain (PheRS)                                       | <i>pheT</i> | gi 16129669 | 79            | 87377     | 10               | 8                    | 15                    |
| 4        | Alanyl-tRNA synthetase (Alanine-tRNA ligase) (AlaRS)                                  | <i>alaS</i> | gi 2507425  | 64            | 95973     | 14               | 5                    | 18                    |
| 5        | DNA gyrase subunit A                                                                  | <i>gyrA</i> | gi 16130166 | 72            | 96903     | 12               | 0                    | 16                    |
| 6        | Glycine decarboxylase, PLP-dependent, subunit (protein P) of glycine cleavage complex | <i>gcvP</i> | gi 1789269  | 98            | 104310    | 11               | 18                   | 17                    |
| 7        | Valyl-tRNA synthetase                                                                 | <i>valS</i> | gi 16132080 | 97            | 108124    | 12               | 13                   | 17                    |
| 8        | Pyruvate dehydrogenase , decarboxylase component E1, thiamin-binding                  | <i>aceE</i> | gi 1786304  | 72            | 99606     | 9                | 17                   | 11                    |
| 9        | leucyl-tRNA synthetase                                                                | <i>leuS</i> | gi 1786861  | 56            | 97171     | 8                | 3                    | 13                    |
| 10       | Phosphoribosylformylglycinamide (FGAM) synthase                                       | <i>purL</i> | gi 49176239 | 70            | 141314    | 10               | 6                    | 11                    |
| 11       | Aminopeptidase N                                                                      | <i>pepN</i> | gi 75189987 | 50            | 98877     | 4                | 16                   | 8                     |
| 12       | Maltodextrin phosphorylase                                                            | <i>malP</i> | gi 7246004  | 114           | 90322     | 15               | 14                   | 27                    |
| 13       | DNA gyrase subunit B                                                                  | <i>gyrB</i> | gi 49176395 | 67            | 89819     | 10               | 11                   | 15                    |

|    |                                                                                                        |             |             |     |       |    |    |    |
|----|--------------------------------------------------------------------------------------------------------|-------------|-------------|-----|-------|----|----|----|
| 14 | Pyruvate-formate lyase                                                                                 | <i>pflB</i> | gi 16128870 | 173 | 85303 | 12 | 18 | 26 |
| 15 | Molecular chaperone<br>DnaK                                                                            | <i>dnaK</i> | gi 15799694 | 63  | 69072 | 7  | 10 | 19 |
| 16 | Aspartyl-tRNA synthetase                                                                               | <i>aspS</i> | gi 16129819 | 133 | 65872 | 16 | 16 | 34 |
| 17 | Protein disaggregation<br>chaperone                                                                    | <i>clpB</i> | gi 16130513 | 123 | 95526 | 12 | 29 | 20 |
| 18 | Prolyl-tRNA synthetase                                                                                 | <i>proS</i> | gi 16128187 | 130 | 63662 | 11 | 3  | 22 |
| 19 | Protein disaggregation<br>chaperone                                                                    | <i>clpB</i> | gi 1788943  | 106 | 95526 | 11 | 13 | 19 |
| 20 | Malate synthase                                                                                        | <i>glcB</i> | gi 16130876 | 61  | 80438 | 7  | 24 | 15 |
| 21 | Transketolase 1,<br>thiamin-binding                                                                    | <i>tktA</i> | gi 48994911 | 64  | 72166 | 9  | 6  | 22 |
| 22 | Uronate isomerase                                                                                      | <i>uxaC</i> | gi 15803633 | 72  | 53879 | 8  | 1  | 25 |
| 23 | Translation elongation<br>factors G(GTPases)                                                           | <i>fusA</i> | gi 15803853 | 72  | 77532 | 6  | 15 | 14 |
| 24 | 30S ribosomal subunit<br>protein S1                                                                    | <i>rpsA</i> | gi 1787140  | 62  | 61121 | 7  | 15 | 23 |
| 25 | Bifunctional<br>phosphoribosylaminoimid<br>azolecarboxamide<br>formyltransferase/IMP<br>cyclohydrolase | <i>purH</i> | gi 16131836 | 63  | 57293 | 6  | 15 | 19 |
| 26 | Glycerol kinase                                                                                        | <i>glpK</i> | gi 16131764 | 82  | 56195 | 11 | 1  | 31 |
| 27 | Aminoacyl-histidine<br>dipeptidase (peptidase D)                                                       | <i>pepD</i> | gi 1786432  | 47  | 52882 | 4  | 8  | 9  |
| 28 | Bifunctional GMP<br>synthase/glutamine amido<br>transferase protein                                    | <i>guaA</i> | gi 16130432 | 80  | 58642 | 9  | 4  | 20 |
| 29 | Lysine tRNA synthetase,                                                                                | <i>lysS</i> | gi 16130792 | 60  | 57567 | 6  | 26 | 15 |

|    |                                                                                                                    |             |             |     |       |    |    |    |
|----|--------------------------------------------------------------------------------------------------------------------|-------------|-------------|-----|-------|----|----|----|
|    | constitutive                                                                                                       |             |             |     |       |    |    |    |
| 30 | Lysyl-tRNA synthetase,<br>heat inducible                                                                           | <i>lysU</i> | gi 26250946 | 92  | 58795 | 10 | 10 | 24 |
| 31 | S1 ribosomal protein                                                                                               | <i>rpsA</i> | gi 42900    | 64  | 60979 | 7  | 8  | 21 |
| 32 | Oligopeptidase A                                                                                                   | <i>opdA</i> | gi 1789913  | 85  | 77119 | 9  | 0  | 17 |
| 33 | Arginyl-tRNA synthetase                                                                                            | <i>argS</i> | gi 16129828 | 97  | 64642 | 12 | 16 | 22 |
| 34 | Phosphoenolpyruvate<br>carboxykinase                                                                               | <i>pckA</i> | gi 75241506 | 68  | 59578 | 6  | 30 | 17 |
| 35 | Phosphoglyceromutase ,<br>cofactor independent                                                                     | <i>gpmI</i> | gi 16131483 | 134 | 56158 | 11 | 9  | 30 |
| 36 | Tagaturonate reductase                                                                                             | <i>uxaB</i> | gi 49176119 | 102 | 54774 | 9  | 12 | 27 |
| 37 | Peptidyl-prolyl cis/trans<br>isomerase (trigger factor)                                                            | <i>tig</i>  | gi 1786640  | 120 | 48163 | 10 | 10 | 27 |
| 38 | FKBP-type<br>peptidyl-prolyl cis-trans<br>isomerase (trigger factor)                                               | <i>tig</i>  | gi 75189505 | 111 | 48149 | 10 | 16 | 28 |
| 39 | Mixture, components:                                                                                               |             |             |     |       |    |    |    |
|    | Phosphoglycerate kinase                                                                                            | <i>pgk</i>  | gi 16130827 | 70  | 41093 | 7  | 9  | 25 |
|    | Alkyl hydroperoxide<br>reductase, C22 subunit                                                                      | <i>ahpC</i> | gi 1786822  | 61  | 20748 | 5  |    | 32 |
| 40 | Phosphoglycerate kinase                                                                                            | <i>pgk</i>  | gi 1789294  | 63  | 41093 | 6  | 14 | 22 |
| 41 | 30S ribosomal subunit<br>protein S1                                                                                | <i>rpsA</i> | gi 24051180 | 63  | 61121 | 6  | 14 | 15 |
| 42 | Chaperonin GroEL                                                                                                   | <i>groL</i> | gi 75239112 | 160 | 57293 | 12 | 0  | 43 |
| 43 | Pyruvate/2-oxoglutarate<br>dehydrogenase complex,<br>dihydrolipoamide<br>dehydrogenase (E3)<br>component , Glycine | <i>lpdA</i> | gi 1786307  | 58  | 50657 | 5  | 31 | 12 |

|    |                                                                                     |             |             |     |       |    |    |    |
|----|-------------------------------------------------------------------------------------|-------------|-------------|-----|-------|----|----|----|
|    | cleavage system L protein                                                           |             |             |     |       |    |    |    |
| 44 | Trigger factor                                                                      | <i>tig</i>  | gi 91209509 | 68  | 47836 | 6  | 14 | 22 |
| 45 | ATP synthase subunit B                                                              | <i>atpD</i> | gi 15804332 | 105 | 50294 | 8  | 11 | 28 |
| 46 | Pyruvate kinase                                                                     | <i>pykF</i> | gi 75214842 | 76  | 48722 | 8  | 12 | 29 |
| 47 | Glutamine<br>Phosphoribosylpyrophosp<br>hate (PRPP)<br>amidotransferase, Chain<br>B | <i>purF</i> | gi 16130247 | 145 | 56453 | 14 | 1  | 40 |
| 48 | Aldehyde dehydrogenase<br>A, NAD-linked                                             | <i>aldA</i> | gi 16129376 | 91  | 52240 | 8  | 17 | 23 |
| 49 | Citrate synthase                                                                    | <i>glcA</i> | gi 146196   | 88  | 48032 | 8  | 14 | 22 |
| 50 | Citrate synthase                                                                    | <i>glcA</i> | gi 1786939  | 100 | 47984 | 9  | 10 | 29 |
| 51 | Tryptophanase<br>(L-tryptophan indole-<br>lyase) (TNase)                            | <i>tnaA</i> | gi 41018359 | 125 | 52768 | 12 | 3  | 27 |
| 52 | Succinyl-CoA Synthetase,<br>beta subunit                                            | <i>sucC</i> | gi 6980728  | 131 | 41052 | 11 | 1  | 40 |
| 53 | Seryl-tRNA synthetase                                                               | <i>serS</i> | gi 15830232 | 61  | 20406 | 7  | 23 | 22 |
| 54 | D-tagatose<br>1,6-bisphosphate aldolase<br>2, subunit                               | <i>gatZ</i> | gi 16130033 | 72  | 47109 | 7  | 19 | 28 |
| 55 | Elongation Factor<br>Complex<br>Ef-TuEF-Ts, Chain C<br>(EF-Tu)                      | <i>tufA</i> | gi 1942723  | 68  | 42150 | 6  | 17 | 22 |
| 56 | Maltodextrin-Binding<br>Protein (Maltose-Binding<br>Protein) Mutant                 | <i>malE</i> | gi 809263   | 82  | 39897 | 7  | 22 | 29 |

|    |                                                                 |             |             |     |       |    |    |    |
|----|-----------------------------------------------------------------|-------------|-------------|-----|-------|----|----|----|
| 57 | Glycine/Serine<br>hydroxymethyltransferase<br>, Chain D         | <i>glyA</i> | gi 7767020  | 75  | 45272 | 7  | 6  | 27 |
| 58 | 6-phosphogluconate<br>dehydrogenase                             | <i>gnd</i>  | gi 642410   | 82  | 48794 | 7  | 1  | 20 |
| 59 | Fructose-1,6-bisphosphat<br>e aldolase, Class II                | <i>fbaA</i> | gi 2392634  | 63  | 38992 | 6  | 11 | 25 |
| 60 | UDP-galactose-4-epimera<br>se                                   | <i>galE</i> | gi 49176045 | 95  | 37242 | 8  | 29 | 33 |
| 61 | Glutamyl-tRNA<br>synthetase                                     | <i>gltX</i> | gi 16130330 | 78  | 53782 | 8  | 21 | 22 |
| 62 | Enolase                                                         | <i>eno</i>  | gi 16975437 | 90  | 45495 | 9  | 23 | 37 |
| 63 | Fructose-bisphosphate<br>aldolase, Class I                      | <i>fbaB</i> | gi 90111385 | 72  | 38085 | 5  | 15 | 19 |
| 64 | Phenylalanyl-tRNA<br>synthetase alpha subunit                   | <i>pheS</i> | gi 16129670 | 82  | 36809 | 7  | 12 | 32 |
| 65 | Succinyl-CoA Synthetase,<br>alpha subunit                       | <i>sucD</i> | gi 6980727  | 63  | 29646 | 6  | 10 | 36 |
| 66 | Glyceraldehyde<br>3-phosphate<br>dehydrogenase                  | <i>gapA</i> | gi 468157   | 130 | 33507 | 12 | 14 | 53 |
| 67 | Periplasmic<br>L-asparaginase II                                | <i>ansB</i> | gi 1789327  | 64  | 36828 | 6  | 7  | 29 |
| 68 | D-tagatose<br>1,6-bisphosphate aldolase<br>2, catalytic subunit | <i>gatY</i> | gi 90111384 | 65  | 30793 | 6  | 33 | 31 |
| 69 | Malate dehydrogenase                                            | <i>mdh</i>  | gi 10185998 | 90  | 30075 | 8  | 7  | 46 |
| 70 | Elongation Factor<br>Complex                                    | <i>tsf</i>  | gi 1942724  | 73  | 30273 | 6  | 16 | 25 |

|    |                                                                   |             |             |     |       |    |    |    |
|----|-------------------------------------------------------------------|-------------|-------------|-----|-------|----|----|----|
|    | Ef-TuEF-Ts, Chain D<br>(EF-Ts)                                    |             |             |     |       |    |    |    |
| 71 | Transaldolase B                                                   | <i>talB</i> | gi 14277926 | 70  | 35022 | 7  | 12 | 33 |
| 72 | Cysteine synthase A,<br>O-acetylserine<br>sulfhydrolase A subunit | <i>cysK</i> | gi 15802947 | 230 | 34468 | 11 | 0  | 74 |
| 73 | Serine acetyltransferase                                          | <i>cysE</i> | gi 1790035  | 66  | 29317 | 6  | 16 | 38 |
| 74 | Cysteine synthase A,<br>O-acetylserine<br>sulfhydrolase A subunit | <i>cysK</i> | gi 1788754  | 174 | 34358 | 12 | 7  | 60 |
| 75 | Phosphoglyceromutase 1                                            | <i>pgmA</i> | gi 1786970  | 64  | 28539 | 6  | 9  | 24 |
| 76 | Iron-containing<br>superoxide dismutase                           | <i>sodB</i> | gi 56159892 | 48  | 21121 | 4  | 16 | 30 |
| 77 | Alkyl hydroperoxide<br>reductase, C22 subunit                     | <i>ahpC</i> | gi 15800320 | 56  | 20748 | 5  | 15 | 39 |
